# Supplementary material for: Colorimetric Diagnostic Capillary Enabled by Size Sieving in a Porous Hydrogel
Source: PubMed Central journal article supplement (PMC7598291; doi:10.3390/bios10100130), 2020-09-23
Supplement: biosensors-10-00130-s001.pdf [file biosensors-10-00130-s001.pdf]

# Colorimetric Diagnostic Capillary Enabled by Size Sieving in a Porous Hydrogel

John Mello Camille C. Guzman<sup>1</sup>, Sheng-Min Hsu<sup>2</sup>, and Han-Sheng Chuang<sup>1,3,\*</sup>

<sup>1</sup> Department of Biomedical Engineering, National Cheng Kung University, Tainan 701, Taiwan

<sup>2</sup> Department of Ophthalmology, National Cheng Kung University Hospital, Tainan 701, Taiwan

<sup>3</sup> Center for Micro/Nano Science and Technology, National Cheng Kung University, Tainan 701, Taiwan

Corresponding author: [oswaldchuang@mail.ncku.edu.tw](mailto:oswaldchuang@mail.ncku.edu.tw)

## Supplementary Material Section 1

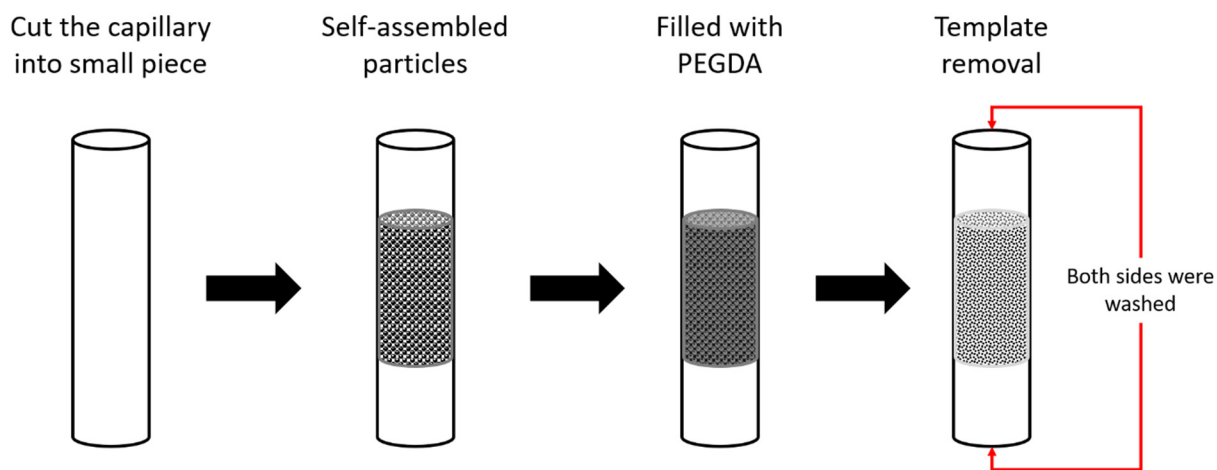

Figure S1. Porous hydrogel fabrication: PS particles removal.

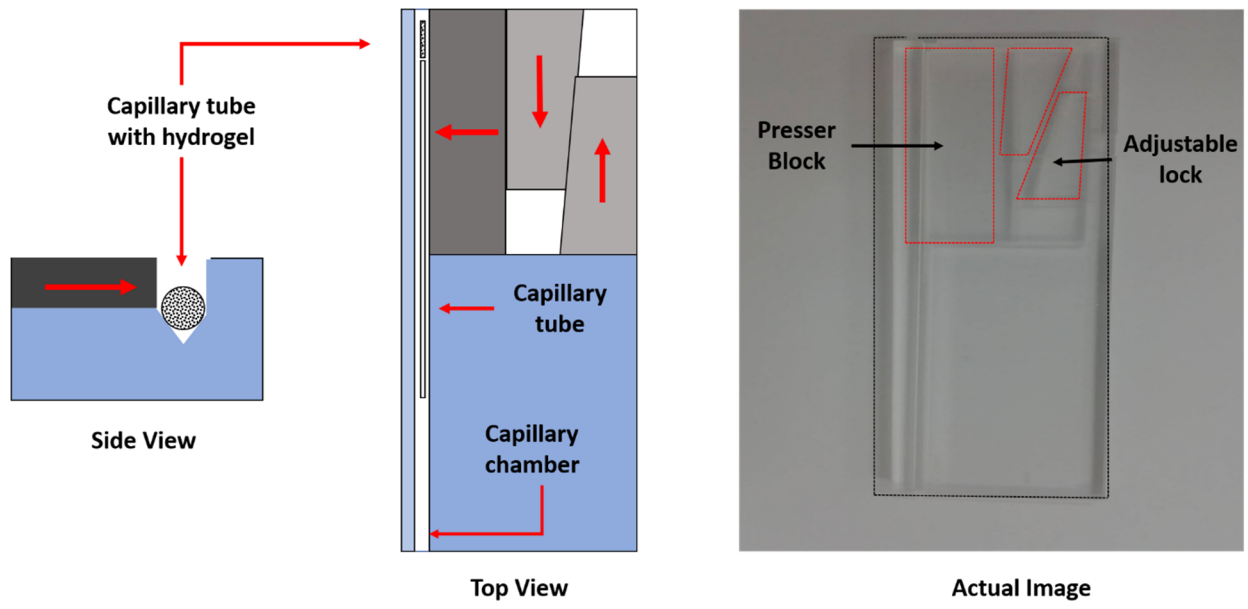

Figure S2. Porous hydrogel relocation to new capillary tube.

## Supplementary Material Section 2

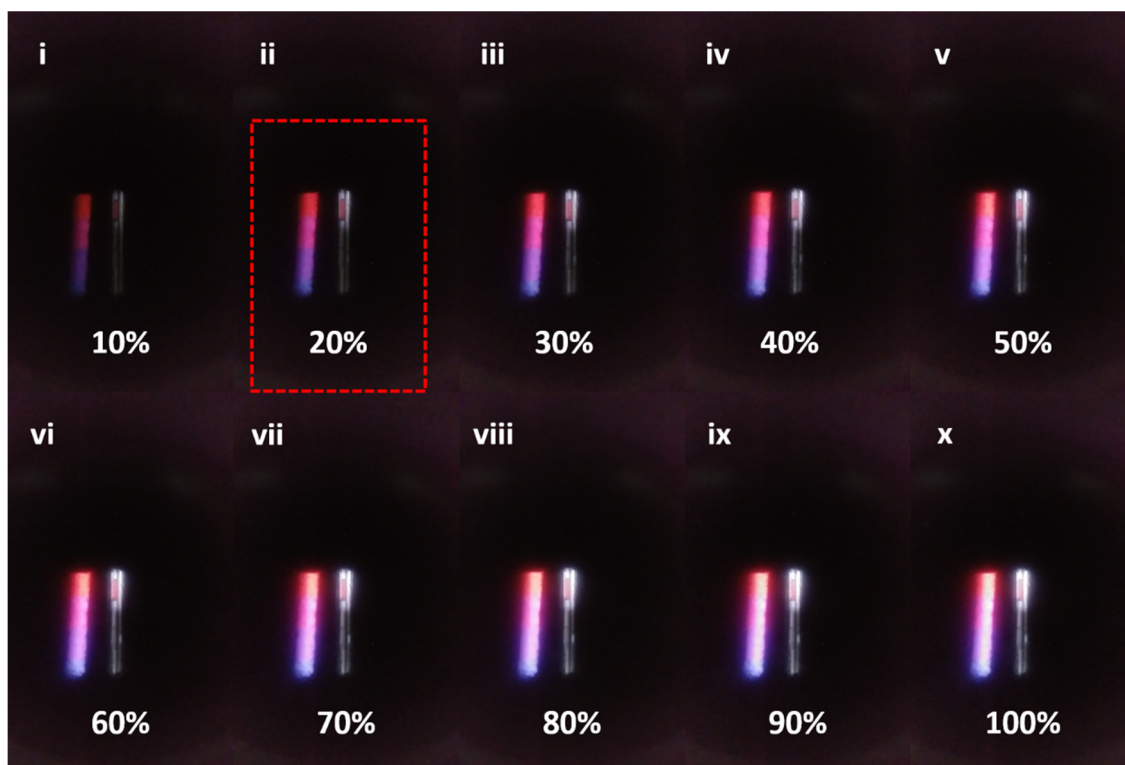

Figure S3. Backlight Optimization.

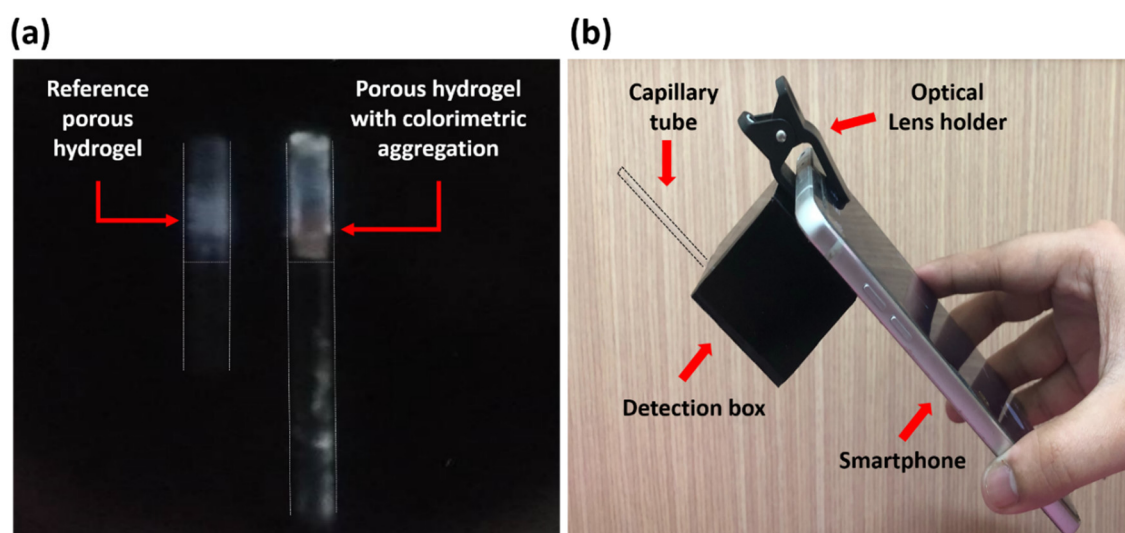

Figure S4. (a) Image taken inside the detection box. (b) Actual experimental set-up of detection platform.

### Supplementary Material Section 3

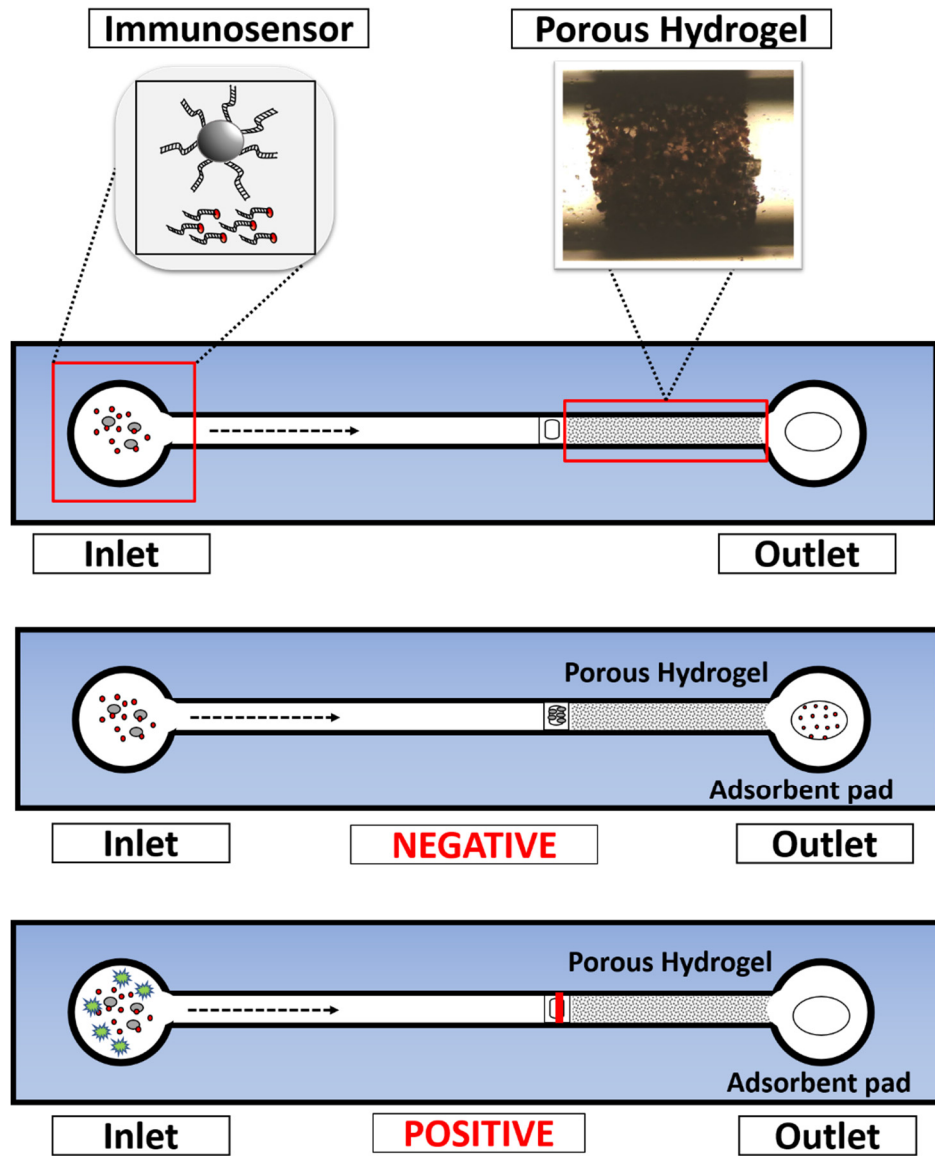

Figure S5. Porous hydrogel relocation to new capillary tube.
